# Supplementary material for: Ablation of GPR56 Causes β-Cell Dysfunction by ATP Loss through Mistargeting of Mitochondrial VDAC1 to the Plasma Membrane
Source: MDPI journal article supplement (doi:10.3390/biom13030557), 2023-03-18
Supplement: s1 [file s1]

## Supplementary Tables

**Table S1.** The list and identities of siRNA and shRNA used in the study.

|                                      |                         |            |
|--------------------------------------|-------------------------|------------|
| GPR56 shRNA (m) Lentiviral Particles | Santa Cruz              | sc-60750-V |
| GPR56 (ADGRG1) siRNA (r)             | ThermoFisher Scientific | s141373    |
| GPR56 (ADGRG1) siRNA (r)             | ThermoFisher Scientific | s141374    |
| GPR56 (ADGRG1) siRNA (r)             | ThermoFisher Scientific | s141375    |
| GPR56 (ADGRG1) siRNA (h)             | ThermoFisher Scientific | s17757     |
| GPR56 (ADGRG1) siRNA (h)             | ThermoFisher Scientific | s17759     |
| GPR56 (ADGRG1) siRNA (h)             | ThermoFisher Scientific | s17758     |

**Table S2.** Primer sequence identities used in the study.

|                      |                         |               |
|----------------------|-------------------------|---------------|
| VDAC1 primer (rat)   | AB applied biosystem    | Rn00821325_g1 |
| VDAC2 primer (rat)   | AB applied biosystem    | Rn00755819_m1 |
| ChREBP primer (rat)  | AB applied biosystem    | Rn00591943_m1 |
| Txnip primer (rat)   | AB applied biosystem    | Rn01533891_g1 |
| HPRT primer (rat)    | AB applied biosystem    | Rn01527840_m1 |
| PPIA primer (rat)    | AB applied biosystem    | Rn00690933_m1 |
| VDAC1 primer (human) | AB applied biosystem    | Hs01631624_gH |
| HPRT primer (human)  | ThermoFisher Scientific | Hs01003267_m1 |
| PPIA primer (human)  | AB applied biosystem    | Hs04194521_s1 |

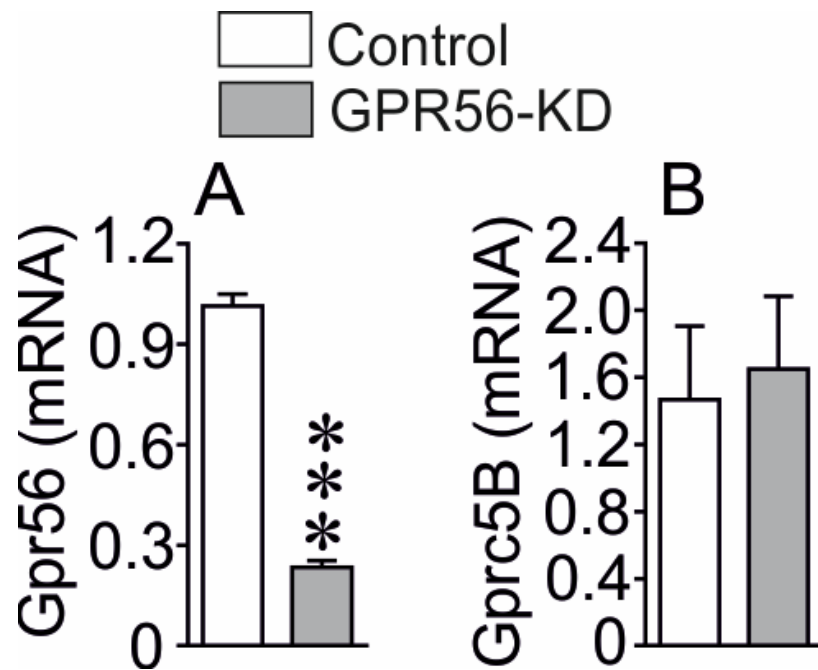

**Figure S1.** The efficiency of *GPR56*-KD in INS-1 832/13 cells. Analysis of *Gpr56* mRNA by qPCR showing a reduced *Gpr56* expression in *Gpr56*-KD (internal control of KD efficiency) (A) and unchanged expression of *Gprc5B* (off-target effect control) (B) compared to scramble controls INS-1 832/13 cells. Mean $\pm$ SEM from four different experiments in each group are shown. \*\*\* $p < 0.001$ .

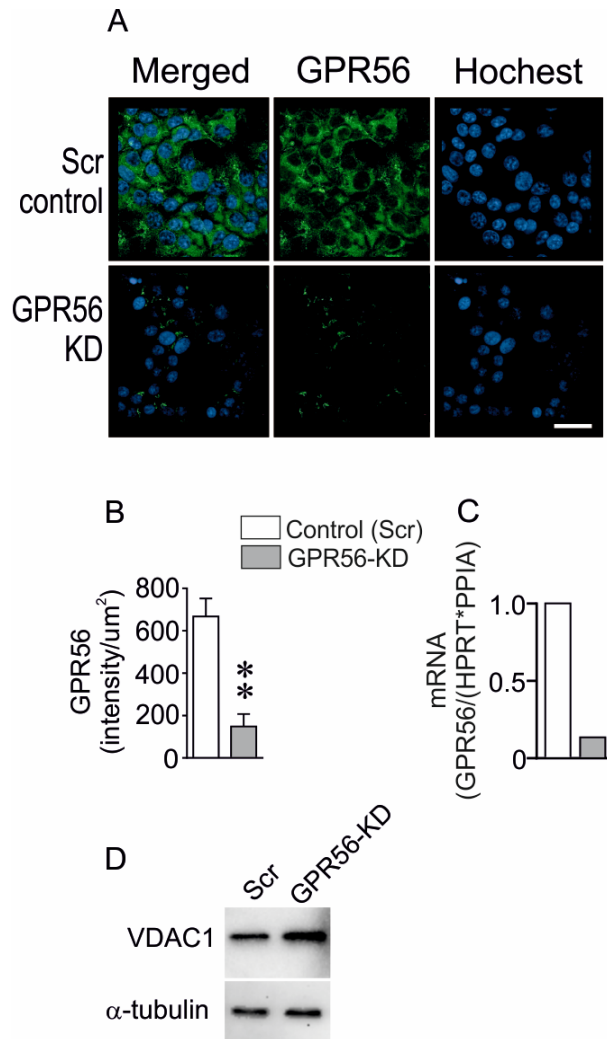

**Figure S2.** The impact of GPR56-KD on GPR56 and VDAC1 protein expression in EndoC  $\beta$ H1 cells. The detection of protein measured by confocal microscopy (A and B) and detection of mRNA analysis by qPCR (C) shows a marked reduction in the GPR56 expression after GPR56-KD in EndoC  $\beta$ H1 cells. A representative confocal microscopic image (A) and the cellular GPR56 expression intensity (B) are shown. Mean $\pm$ SEM for n=3 different experiments are shown. Analysis of GPR56 mRNA in an experiment for scramble control and GPR56-KD cells. Hoechst detection by confocal microscopy in the same cells is also illustrated (A). VDAC1 protein is increased in GPR56-KD EndoC  $\beta$ H1 cells and the results are from four different experiments (D).  $P < 0.01$ . Bar indicates 20  $\mu$ m.

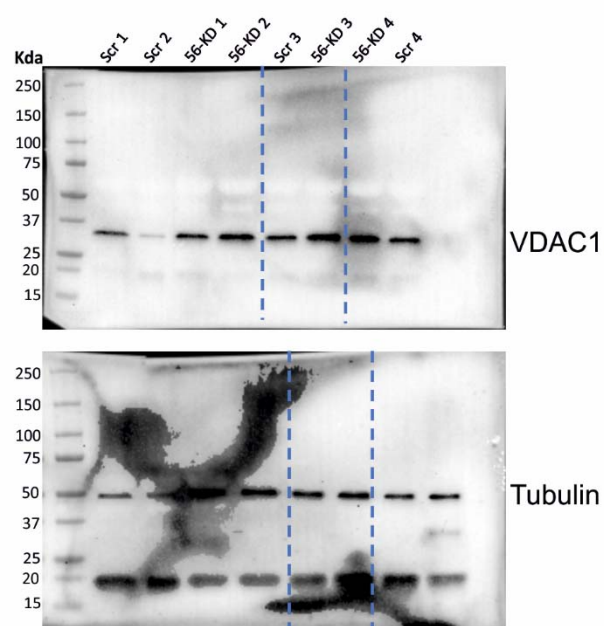

**Figure S3 (related to Figure S2D).** Original Western blot images showing VDAC1 and Tubulin protein expression in scramble control (Scr) and GPR56-KD (56-KD) EndoC  $\beta$ H1 cells from four different experiments. The dotted lines denote the bands shown in Figure S2D.
